# Supplementary material for: Antimicrobial Activity and Protective Effect of Tuscan Bee Pollens on Oxidative and Endoplasmic Reticulum Stress in Different Cell-Based Models
Source: MDPI journal article supplement (doi:10.3390/foods10061422), 2021-06-18
Supplement: s1 [file s1]

## Supplementary materials

**Table S1.** Growth of selected pathogen strains in the presence of increasing concentrations (1, 2.5, 5, and 10 mg/mL) of *Castanea*, *Cistus*, and *Rubus* bee pollen extracts.

| <i>Castanea</i> extract concentrations (mg/mL) |           |           |           |           |                   |
|------------------------------------------------|-----------|-----------|-----------|-----------|-------------------|
| Strains                                        | 0         | 1         | 2.5       | 5         | 10                |
| <i>Escherichia coli</i> ATCC 25922             | 1.20±0.02 | 0.80±0.02 | 0.72±0.02 | 0.60±0.02 | <b>0.10±0.002</b> |
| <i>Salmonella typhimurium</i> ATCC 14028       | 1.22±0.03 | 0.90±0.01 | 0.68±0.02 | 0.70±0.03 | <b>0.10±0.005</b> |
| <i>Enterobacter aerogenes</i> ATCC 13048       | 1.33±0.02 | 1.14±0.03 | 0.50±0.13 | 0.50±0.03 | 0.50±0.01         |
| <i>Enterococcus faecalis</i> ATCC 29212        | 1.28±0.02 | 0.86±0.02 | 0.37±0.01 | 0.44±0.03 | 0.54±0.03         |
| <i>Staphylococcus aureus</i> ATCC 25923        | 1.35±0.05 | 0.81±0.02 | 0.48±0.01 | 0.54±0.03 | <b>0.10±0.003</b> |

| <i>Cistus</i> extract concentrations (mg/mL) |           |           |           |                   |                   |
|----------------------------------------------|-----------|-----------|-----------|-------------------|-------------------|
| Strains                                      | 0         | 1         | 2.5       | 5                 | 10                |
| <i>Escherichia coli</i> ATCC 25922           | 1.30±0.02 | 0.88±0.02 | 0.60±0.02 | 0.50±0.02         | <b>0.07±0.002</b> |
| <i>Salmonella typhimurium</i> ATCC 14028     | 1.20±0.03 | 1.10±0.02 | 0.80±0.02 | 0.60±0.03         | <b>0.08±0.003</b> |
| <i>Enterobacter aerogenes</i> ATCC 13048     | 1.35±0.02 | 1.20±0.03 | 0.90±0.10 | 0.50±0.03         | <b>0.09±0.001</b> |
| <i>Enterococcus faecalis</i> ATCC 29212      | 1.27±0.03 | 0.75±0.02 | 0.57±0.01 | <b>0.08±0.002</b> | 0.05±0.003        |
| <i>Staphylococcus aureus</i> ATCC 25923      | 1.40±0.05 | 0.90±0.02 | 0.50±0.01 | <b>0.06±0.003</b> | 0.03±0.002        |

| <i>Rubus</i> extract concentrations (mg/mL) |           |           |           |           |                   |
|---------------------------------------------|-----------|-----------|-----------|-----------|-------------------|
| Strains                                     | 0         | 1         | 2.5       | 5         | 10                |
| <i>Escherichia coli</i> ATCC 25922          | 1.20±0.02 | 0.83±0.02 | 0.60±0.02 | 0.50±0.03 | 0.45±0.002        |
| <i>Salmonella typhimurium</i> ATCC 14028    | 1.10±0.03 | 0.90±0.02 | 0.70±0.02 | 0.55±0.02 | 0.60±0.003        |
| <i>Enterobacter aerogenes</i> ATCC 13048    | 1.30±0.02 | 1.10±0.03 | 0.80±0.05 | 0.50±0.03 | 0.45±0.01         |
| <i>Enterococcus faecalis</i> ATCC 29212     | 1.28±0.03 | 0.80±0.02 | 0.60±0.02 | 0.35±0.03 | <b>0.10±0.002</b> |
| <i>Staphylococcus aureus</i> ATCC 25923     | 1.35±0.05 | 0.95±0.02 | 0.60±0.01 | 0.30±0.03 | <b>0.07±0.001</b> |

Bacterial growth (O.D. 600 nm). Results are expressed as mean ± SD.
